# Supplementary material for: The higher mortality associated with low serum albumin is dependent on systemic inflammation in end-stage kidney disease
Source: PLOS journal article supplement (doi:10.1371/journal.pone.0190410), 2018-01-03
Supplement: S3 (10.1371/journal.pone.0190410.s003) [file journal.pone.0190410.s003]

**S3 Table:** All-cause mortality risk associated with low S-Alb and high hsCRP (Group 4) during 60 months of follow-up, adjusting for blood pressure instead of CVD (n=822).

|                                              | <b>Crude HR<br/>(95% CI)</b> | <b>p</b>         | <b>Adjusted imputed HR<br/>(95% CI)</b> | <b>p</b>    |
|----------------------------------------------|------------------------------|------------------|-----------------------------------------|-------------|
| <b>Group 2</b><br>Low albumin/ Normal hsCRP  | 1.63 (0.98 - 2.73)           | 0.05             | 1.04 (0.61 – 1.76)                      | 0.89        |
| <b>Group 3</b><br>Normal albumin/ High hsCRP | 2.30 (1.46 - 3.62)           | <0.001           | 1.35 (0.85 – 2.13)                      | 0.21        |
| <b>Group 4</b><br>Low albumin/ High hsCRP    | <b>3.35 (2.22 - 5.04)</b>    | <b>&lt;0.001</b> | <b>1.66 (1.09 - 2.52)</b>               | <b>0.01</b> |

Data are presented as hazard ratios (HR) with 95% confidence interval (CI) crude and adjusted for confounding factors (age, gender, mean BP, DM, smoking, SGA, GFR and renal replacement technique), using Group 1 as reference. Smoking status was imputed in 144 patients and mean BP in 119 patients.
