# Supplementary material for: The higher mortality associated with low serum albumin is dependent on systemic inflammation in end-stage kidney disease
Source: PLOS journal article supplement (doi:10.1371/journal.pone.0190410), 2018-01-03
Supplement: S4 (10.1371/journal.pone.0190410.s004) [file journal.pone.0190410.s004]

**S4 Table.** All-cause mortality risk associated with low S-Alb <35 g/L and high hsCRP ≥3 mg/L (Group 4) during 60 months of follow-up (n=822) without and with adjustments for calcium x phosphate product, cholesterol, triglycerides and hemoglobin.

**S4a Table.** All-cause mortality risk associated with low S-Alb <35 g/L and high hsCRP ≥3 mg/L (Group 4) during 60 months of follow-up (n=822).

|                                              | Adjusted imputed HR (95% CI) | p           |
|----------------------------------------------|------------------------------|-------------|
| <b>Group 2</b><br>Low albumin/ Normal hsCRP  | 1.34 (0.84 – 2.13)           | 0.22        |
| <b>Group 3</b><br>Normal albumin/ High hsCRP | 1.33 (0.87 – 2.03)           | 0.18        |
| <b>Group 4</b><br>Low albumin/ High hsCRP    | <b>1.60 (1.08 - 2.36)</b>    | <b>0.01</b> |

Data are presented as hazard ratios (HR) with 95% confidence interval (CI) crude and adjusted for confounding factors (age, gender, DM, SGA, GFR, renal replacement technique and %HGS), using Group 1 as reference. Imputed data was used for: smoking status in 144 patients, mean BP in 119 patients and %HGS in 41 patients.

**S4b Table.** All-cause mortality risk associated with low S-Alb <35 g/L and high hsCRP ≥3 mg/L (Group 4) during 60 months of follow-up (n=822).

|                                              | Adjusted imputed HR (95% CI) | p    |
|----------------------------------------------|------------------------------|------|
| <b>Group 2</b><br>Low albumin/ Normal hsCRP  | 1.04 (0.62 – 1.79)           | 0.86 |
| <b>Group 3</b><br>Normal albumin/ High hsCRP | 1.25 (0.79 – 2.01)           | 0.34 |
| <b>Group 4</b><br>Low albumin/ High hsCRP    | 1.43 (0.94 - 2.20)           | 0.11 |

Data are presented as hazard ratios (HR) with 95% confidence interval (CI) crude and adjusted for confounding factors (age, gender, DM, **smoking**, mean BP, SGA, GFR, renal replacement technique, %HGS, Ca x PO<sub>4</sub>, cholesterol, triglycerides and hemoglobin), using Group 1 as reference. We have used imputed data for smoking status in 144 patients, mean BP in 119 patients, %HGS in 41 patients, calcium x phosphate product in 36 patients, cholesterol in 5 patients, triglycerides in 7 patients and hemoglobin in one patient.
